# Supplementary material for: Strontium and Zinc Substitution in β-Tricalcium Phosphate: An X-ray Diffraction, Solid State NMR and ATR-FTIR Study
Source: PubMed Central journal article supplement (PMC6616520; doi:10.3390/jfb10020020), 2019-05-05
Supplement: jfb-10-00020-s001.pdf [file jfb-10-00020-s001.pdf]

# Strontium and zinc substitution in $\beta$ -tricalcium phosphate: an X-ray diffraction, solid state NMR and ATR-FTIR study

Elisa Boanini, Massimo Gazzano, Carlo Nervi, Michele R. Chierotti, Katia Rubini, Roberto Gobetto and Adriana Bigi

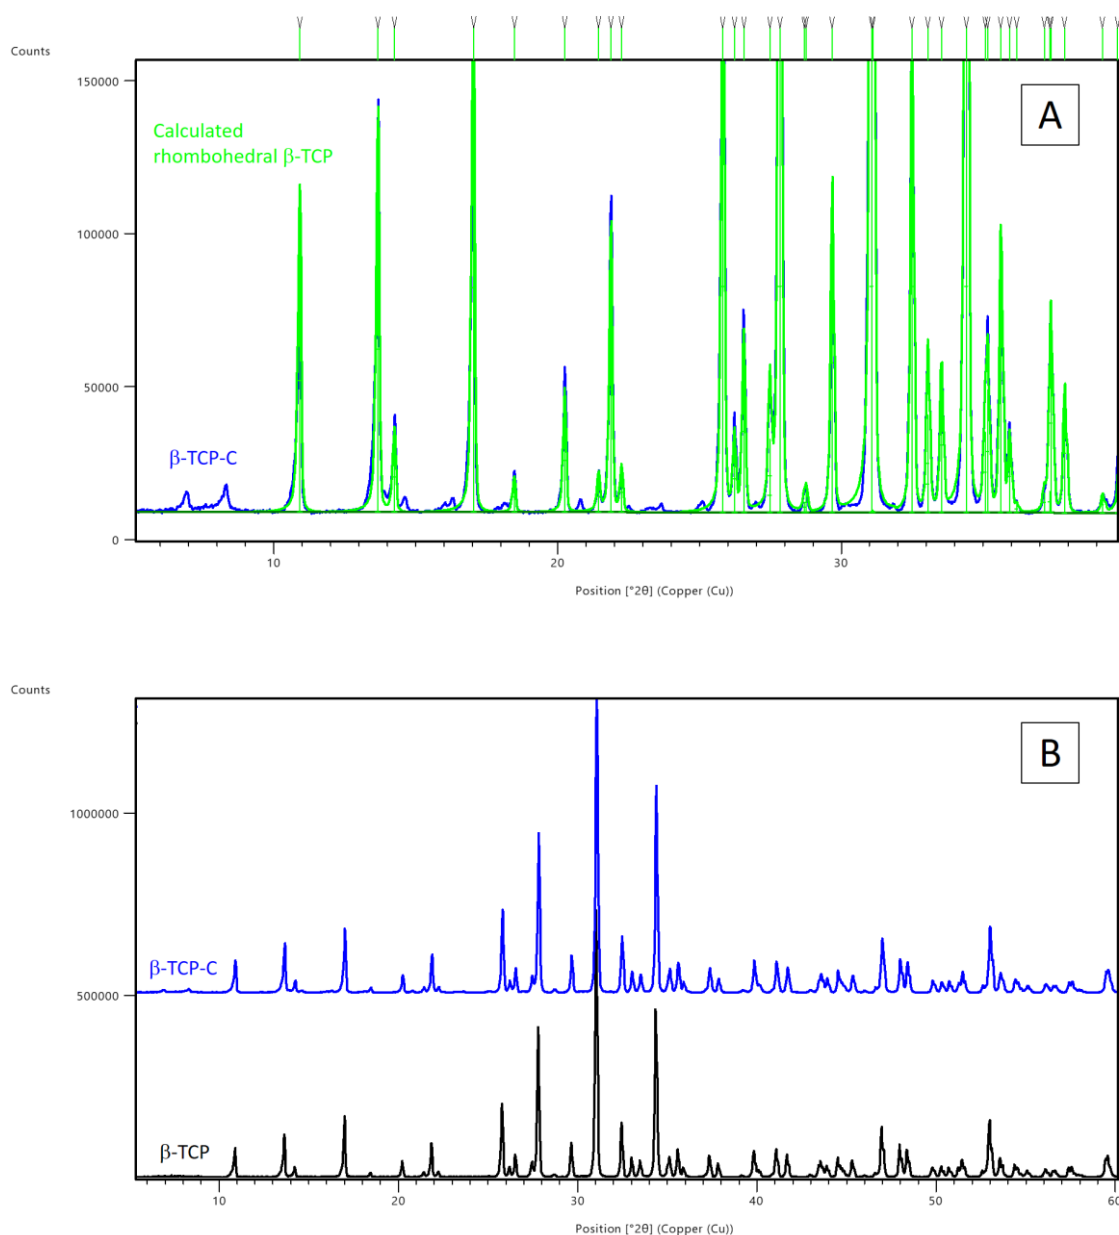

**Figure S1:** (A) comparison between XRD pattern of  $\beta$ -TCP-C (blue) and the calculated pattern for rhombohedral  $\beta$ -TCP (green); (B) comparison of  $\beta$ -TCP-C and  $\beta$ -TCP XRD scans.

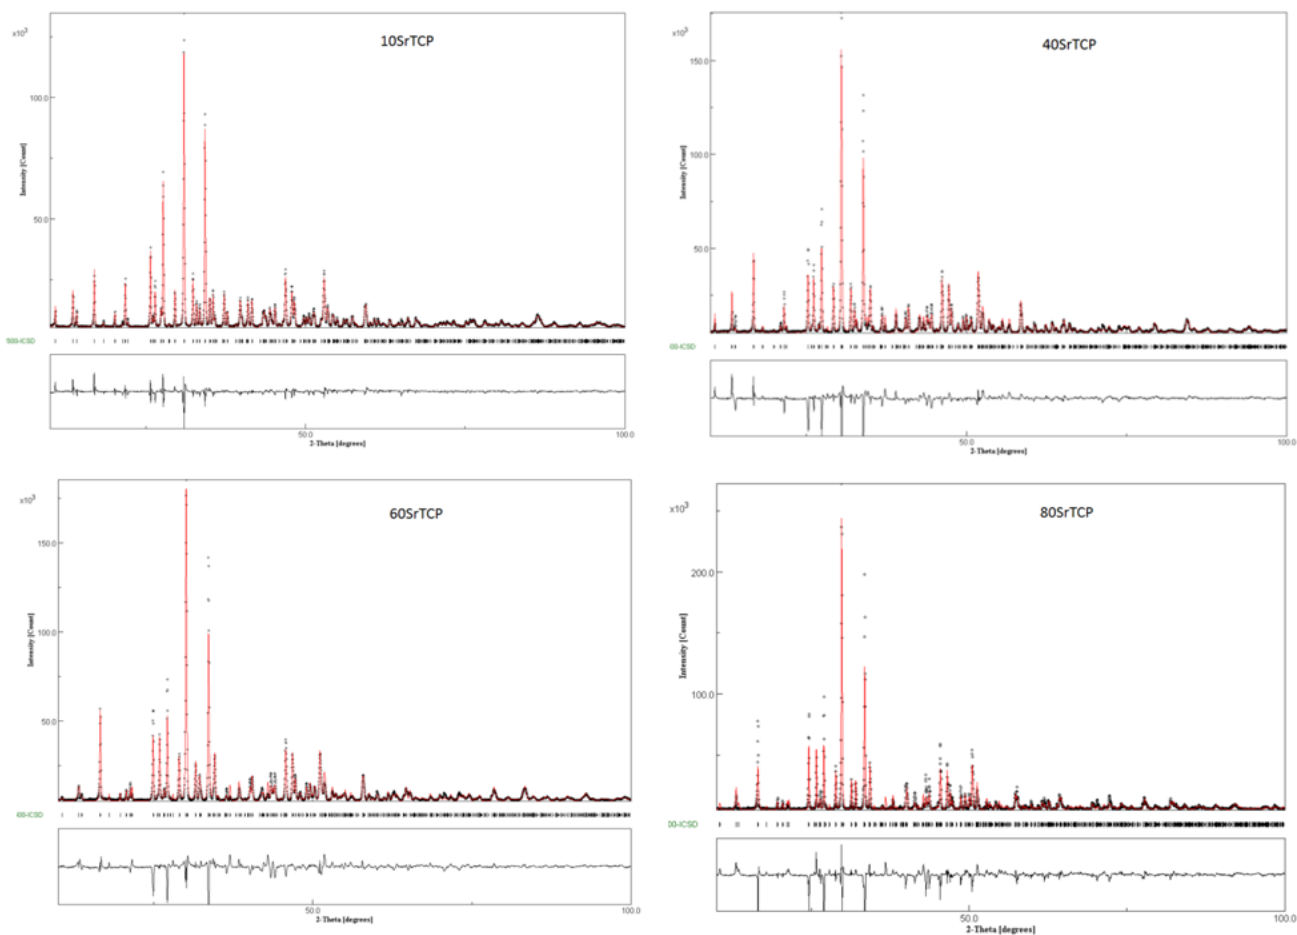

**Figure S2:** comparison of the observed (dots) and calculated (red) XRD patterns of 10SrTCP, 40SrTCP, 60SrTCP, 80SrTCP. Refinements carried out on the  $\beta$ -TCP setting. At the bottom reflection markers and curve difference.

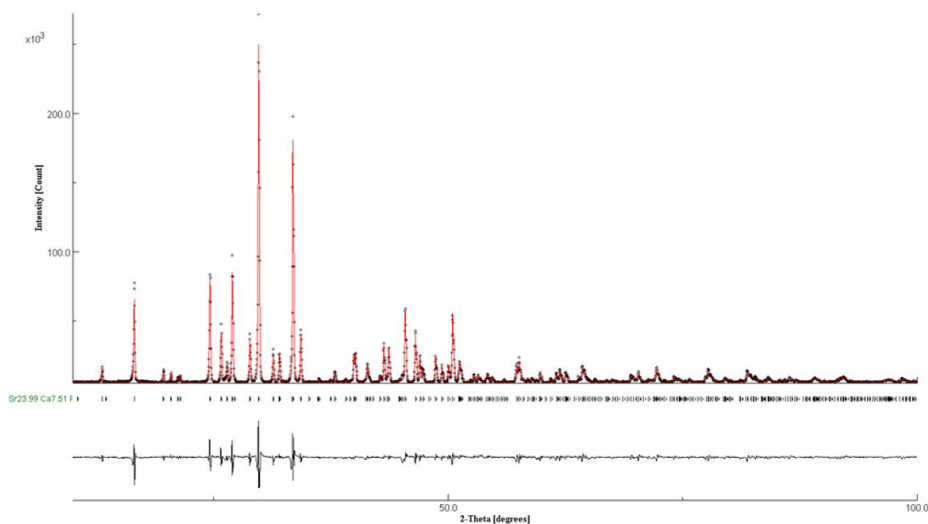

**Figure S3:** comparison of the observed (dots) and calculated (red) XRD patterns of 80SrTCP. Refinement carried out on the  $\beta'$ -TCP setting. At the bottom reflection markers and difference curve.

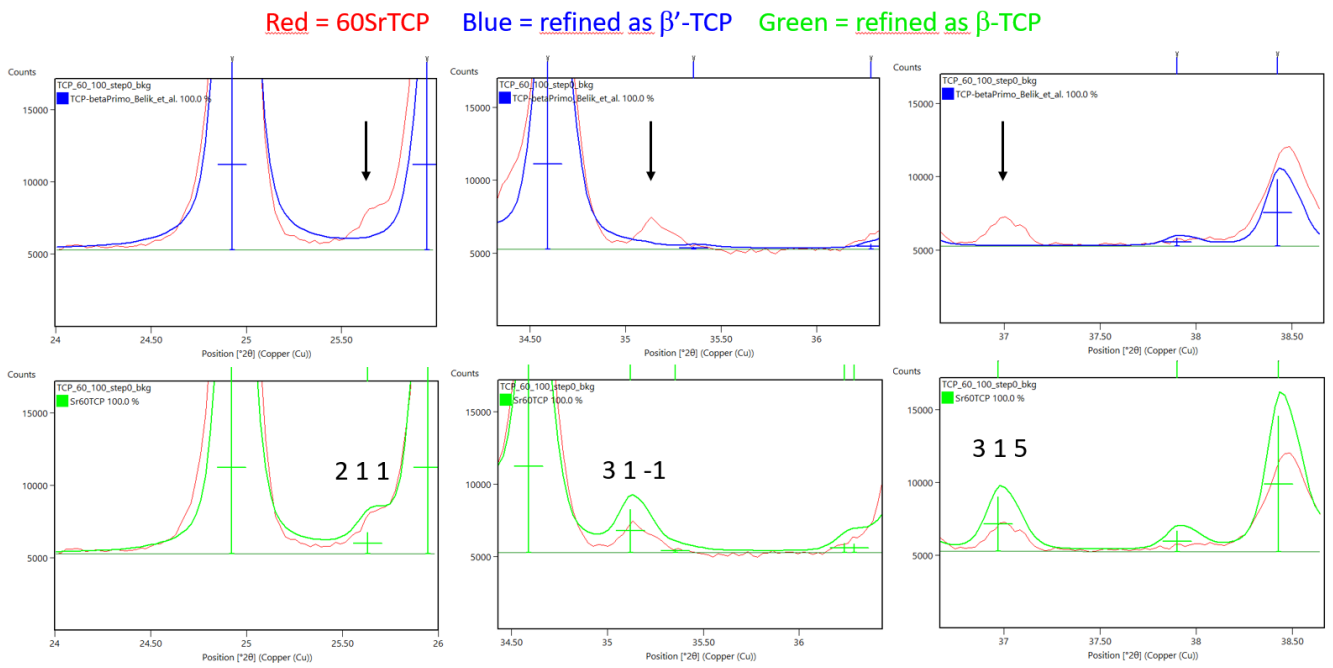

**Figure S4:** comparison between refinements carried out in  $\beta'$ -TCP (top) and  $\beta$ -TCP (bottom) settings for sample 60SrTCP. Arrows show reflections not matched in the  $\beta'$ -TCP structure (top);  $hkl$  indexes assigned in  $\beta$ -TCP structure are indicated (bottom).

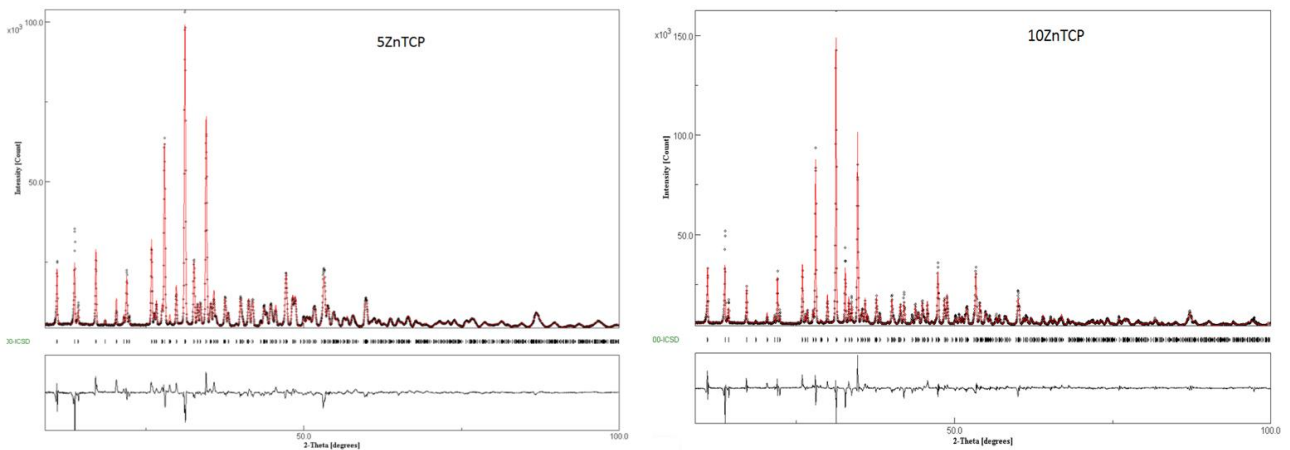

**Figure S5:** comparison of the observed (dots) and calculated (red) XRD patterns of 5ZnTCP and 10ZnTCP. At the bottom reflection markers and curve difference.

**Table S1:** ATR-FTIR bands wavenumbers (cm<sup>-1</sup>).

|    | $\beta$ -TCP | 10SrTCP | 20SrTCP | 40SrTCP | 60SrTCP | 80SrTCP |
|----|--------------|---------|---------|---------|---------|---------|
| v3 | 1116         | 1114    | 1112    | 1109    | 1108    | 1112    |
|    | 1078         | 1075    |         |         | 1053    | 1070    |
|    | 1037         | 1041    | 1039    | 1036    | 1033    |         |
|    | 1000         | 1002    | 1005    | 1006    | 984     | 980     |
| v1 | 968          | 967     | 970     | 971     |         |         |
|    | 943          | 940     | 939     | 937     | 936     | 936     |
| v4 | 604          | 602     | 600     | 597     | 595     |         |
|    | 589          | 587     | 586     | 586     | 586     | 588     |
|    | 579          | 577     | 575     |         |         |         |
|    | 570          | 567     | 566     |         |         | 567     |
|    | 550          | 550     | 550     |         |         |         |
|    | 541          | 541     | 541     | 540     | 539     | 537     |
